# Supplementary material for: Genome-wide DNA Methylation Events in TMPRSS2–ERG Fusion-Negative Prostate Cancers Implicate an EZH2-Dependent Mechanism with miR-26a Hypermethylation
Source: Oxford University Press journal article supplement (doi:10.1158/2159-8290.cd-12-0041), 2012-08-28
Supplement: 21598290cd120041-sup-t1-4_xls_175k.xls [file 21598290cd120041-sup-t1-4_xls_175k.xls]

## Sheet: Table S1
Table S1 Clinical data and sequencing statistics.
Column headings are as follows: (A) sample ID, (B) tissue type: normal or tumor, (C) year of birth, (D) pT tumor stage, for normal tissues the pT value corresponds to the tumor extracted from the patients at an independent site, (E) pN lymph node status, (F) RRP_Gleason: Gleason score of tumour after prostatectomy, (G) TMPRESS:ERG fusion status, (H) RO=raw output contains all reads (I) MO=mappabl…
sample name	tissue type	year of birth	pT	pN	RRP Gleason	fusion state	RO	MO	UMO	GC	UNIQ LOCS	PERC
IGP-102	normal	1947	pT2c	N0	3+3	undet.	68456560	45475526	25975279	43.31	20382937	78.47
IGP-103	normal	1948	pT2c	N0	3+3	undet.	74318146	42675806	23804014	44.55	19035568	79.97
IGP-124	normal	1940	pT2c	NX	3+3	undet.	98006476	53521608	28601765	44.89	24568274	85.9
IGP-126	normal	1953	pT2a	NX	3+3	undet.	52892173	32581227	18364009	44.24	15516115	84.49
IGP-137	normal	1941	pT2c	N0	3+3	undet.	66848601	39838366	23219159	44.34	20203441	87.01
IGP-141	normal	1943	pT2a	NX	3+3	undet.	51224936	34724388	19537152	44.58	15484722	79.26
IGP-142	normal	1952	pT2c	NX	3+3	undet.	43963091	28080583	15677236	44.71	13617611	86.86
IGP-145	normal	1944	pT2c	N0	3+3	undet.	52783688	33159361	19424898	43.37	16911923	87.06
IGP-16	normal	1955	pT2a	NX	3+3	undet.	51057239	28675421	15608230	45.23	12594775	80.69
IGP-17	normal	1947	pT2a	NX	3+3	undet.	56740988	40400203	22487915	45.63	15272669	67.92
IGP173	normal	1946	pT2a	NX	3+3	undet.	51417886	28641639	14416723	46.42	13112089	90.95
IGP-174	normal	1950	pT2c	NX	3+3	undet.	59041613	33276094	16809555	45.79	15178229	90.3
IGP-176	normal	1940	pT2c	NX	3+3	undet.	57284530	36356697	21324415	43.5	18562919	87.05
IGP-178	normal	1949	pT2c	NX	3+3	undet.	51104131	34297202	18490495	47.2	14371889	77.73
IGP-18	normal	1937	pT2a	NX	3+3	undet.	45650698	33620042	17841523	45.57	13543504	75.91
IGP-181	normal	1946	pT2c	NX	3+3	undet.	98172123	55734105	29165848	44.31	25066973	85.95
IGP-183	normal	1940	pT2a	N0	3+3	undet.	112822724	61876870	32202440	44.32	27137153	84.27
IGP-185	normal	1951	pT2c	NX	3+3	undet.	53649442	30436056	16071428	44.68	13973848	86.95
IGP-186	normal	1945	pT2c	NX	3+3	undet.	54515436	31708116	16676050	44.51	14420409	86.47
IGP-189	normal	1941	pT2c	N0	3+3	undet.	57222448	35833353	20084794	44.66	17232187	85.8
IGP-20	normal	1952	pT2a	NX	3+3	undet.	48206419	27433261	15659087	44.04	13362436	85.33
IGP-76	normal	1950	pT2c	N0	3+3	undet.	48034724	31885241	17100196	46.27	13942540	81.53
IGP-78	normal	1939	pT2c	NX	3+3	undet.	45909128	26150283	14655147	45.4	12016485	81.99
IGP-84	normal	1958	pT2a	NX	3+3	undet.	39600397	22704940	11868919	45.58	11214603	94.49
IGP-89	normal	1960	pT2c	NX	3+3	undet.	55766773	32728549	17862831	43.83	15224091	85.23
IGP-90	normal	1953	pT2a	NX	3+3	undet.	56862178	34155660	19029453	44.48	16687643	87.69
IGP-119	normal	1948	pT3a	N0	3+4	undet.	50908740	34767127	19795621	44.03	15827541	79.95
IGP-120	normal	1946	pT2c	N0	3+4	undet.	80921862	42644806	24552994	44.48	21250761	86.55
IGP-122	normal	1948	pT3a	N0	3+4	undet.	100201262	54670328	29877288	44.91	25692140	85.99
IGP-123	normal	1942	pT3a	N0	3+4	undet.	90420071	48786362	27016764	44.82	23620634	87.43
IGP-127	normal	1940	pT2c	NX	3+4	undet.	47412111	27201661	14939017	43.74	13012755	87.11
IGP-138	normal	1958	pT2c	NX	3+4	undet.	63082047	35906937	20629183	44.28	18301446	88.72
IGP-139	normal	1938	pT3a	NX	3+4	undet.	39616752	27403901	15382690	43.51	12492637	81.21
IGP-140	normal	1941	pT2a	NX	3+4	undet.	49529363	34479687	18890379	44.54	14813613	78.42
IGP-143	normal	1948	pT3a	NX	3+4	undet.	52982668	33310383	18963566	43.96	16336437	86.15
IGP-144	normal	1938	pT2c	NX	3+4	undet.	61124190	38731710	21487037	44.03	18111379	84.29
IGP-175	normal	1942	pT2c	N0	3+4	undet.	51925065	33823597	19395047	44.43	16634262	85.77
IGP-177	normal	1938	pT3a	N0	3+4	undet.	52058091	33443364	19041749	43.84	16663862	87.51
IGP-180	normal	1945	pT2c	NX	3+4	undet.	57847675	33161266	17223682	44.6	14592705	84.72
IGP-182	normal	1939	pT2c	NX	3+4	undet.	57099861	33629121	18519053	44.36	15992475	86.36
IGP-184	normal	1937	pT3a	N0	3+4	undet.	61981298	35899582	20009549	44.97	17352422	86.72
IGP-187	normal	1949	pT2a	N0	3+4	undet.	58085890	33333127	17114023	44.88	15129622	88.4
IGP-188	normal	1949	pT2c	NX	3+4	undet.	56646174	35557086	20122646	44.31	17913535	89.02
IGP-75	normal	1941	pT2a	NX	3+4	undet.	84880133	50069760	26992346	45.2	19036888	70.53
IGP-79	normal	1958	pT2c	NX	3+4	undet.	69981957	36066238	20179838	45.74	16632938	82.42
IGP-86	normal	1944	pT2a	N0	3+4	undet.	54865647	32496585	16933259	46.36	14397938	85.03
IGP-87	normal	1936	pT3a	NX	3+4	undet.	57567293	34677735	17904425	46.97	15246219	85.15
IGP-91	normal	1951	pT3a	N0	3+4	undet.	53506642	35333967	20688965	44.05	18190022	87.92
IGP-92	normal	1934	pT2c	N0	3+4	undet.	53182799	34943004	21225080	42.73	17246366	81.25
IGP-104	normal	1944	pT2c	N0	4+3	undet.	55675343	35269796	20426022	43.05	16383403	80.21
IGP-85	normal	1942	pT2c	NX	4+3	undet.	43193831	24174166	11995768	46.03	10707426	89.26
IGP-88	normal	1941	pT2c	N0	4+3	undet.	47261785	27497227	15369466	43.33	13354588	86.89
IGP-179	normal	1949	pT2a	N0	4+5	undet.	54128701	34045189	17444721	46.21	12288238	70.44
IGP-105	tumor	1938	pT2c	NX	3+3	yes	59046782	39955939	22627403	43.53	17939913	79.28
IGP-115	tumor	1957	pT2c	NX	3+3	yes	60501526	33910719	17919489	45.23	15450186	86.22
IGP-117	tumor	1938	pT2a	NX	3+3	yes	56230109	37960650	21264249	44.73	16751183	78.78
IGP-28	tumor	1943	pT2c	NX	3+3	yes	62740332	39437264	21309174	44.86	18206591	85.44
IGP-47	tumor	1947	pT3a	N0	3+4	yes	60957035	37825490	20728441	44.61	17958198	86.64
IGP-48	tumor	1948	pT3a	N0	3+4	yes	58140900	46074499	37784091	43.84	23516332	62.24
IGP-60	tumor	1938	pT3b	N0	3+4	yes	59253857	36556557	21143264	44.31	17355076	82.08
IGP-61	tumor	1950	pT3b	N0	3+4	yes	45595176	26838936	15746162	45.24	13826874	87.81
IGP-64	tumor	1947	pT2c	N0	3+4	yes	38347329	25134042	14007683	44.17	12026531	85.86
IGP-80	tumor	1957	pT3a	N0	3+4	yes	55965783	44433499	36146260	43.87	22842781	63.2
IGP-37	tumor	1959	pT2c	N0	4+3	yes	43026265	24602998	12253351	45.59	11251583	91.82
IGP-40	tumor	1940	pT3a	N1	4+3	yes	51633965	29778137	15274268	46.43	13967881	91.45
IGP-41	tumor	1941	pT3b	N1	4+3	yes	55523762	32957526	18449676	44.37	15667805	84.92
IGP-44	tumor	1940	pT3a	N1	4+3	yes	46499316	28432968	16217866	43.62	13931309	85.9
IGP-49	tumor	1935	pT3b	N1	4+3	yes	49148262	39685619	32202247	44.19	19782744	61.43
IGP-62	tumor	1946	pT3b	N0	4+3	yes	67815258	40346421	22650006	44.52	19671682	86.85
IGP-25	tumor	1946	pT3a	N1	4+5	yes	44791527	29955186	15696357	46.18	13286411	84.65
IGP-116	tumor	1942	pT3a	N0	3+4	no	61533753	40654229	23742239	44.12	18999044	80.02
IGP-118	tumor	1947	pT3a	N0	3+4	no	43971881	30633533	17216250	44.66	13962289	81.1
IGP-43	tumor	1951	pT2c	N0	3+4	no	49619013	28250864	16655105	43.63	14385435	86.37
IGP-110	tumor	1951	pT2c	N0	4+3	no	54499098	29666880	15948545	45.88	13759478	86.27
IGP-23	tumor	1957	pT2c	N0	4+3	no	45803513	33463519	19346383	46.19	15083941	77.97
IGP-29	tumor	1939	pT3a	N0	4+3	no	55061939	37051789	21720788	46.75	16620700	76.52
IGP-36	tumor	1941	pT2c	N0	4+3	no	52738090	38848297	22776596	46.52	12342626	54.19
IGP-51	tumor	1944	pT3b	N0	4+3	no	52914337	41100616	34966685	51.29	21913181	62.67
IGP-52	tumor	1939	pT2c	N0	4+3	no	52880082	42708302	35802794	49.45	22246891	62.14
IGP-55	tumor	1943	pT3b	N0	4+3	no	43393093	29509776	18612224	43.28	15315383	82.29
IGP-57	tumor	1945	pT2c	N1	4+3	no	44415765	30606321	18575564	43.35	15048413	81.01
IGP-81	tumor	1943	pT3a	N0	4+3	no	53579451	43437432	38274016	44.49	24267508	63.4
IGP-83	tumor	1943	pT2c	N0	4+3	no	65581870	51785995	42993428	50.63	24623023	57.27
IGP-31	tumor	1942	pT3b	N0	4+4	no	56439838	40500979	23792758	45.45	18295961	76.9
IGP-21	tumor	1940	pT3b	N0	4+5	no	65234680	37238055	22084069	45.04	18552547	84.01
IGP-33	tumor	1940	pT3a	N1	4+5	no	62232985	45203064	27020748	47.31	14865355	55.01
IGP-38	tumor	1942	pT3b	N1	4+5	no	63429557	36451086	20675251	46.36	18957329	91.69
IGP-26	tumor	1940	pT4a	N1	5+4	no	49686845	36497324	20836011	46.37	16021287	76.89
IGP-32	tumor	1939	pT3b	N0	5+4	no	43187431	32277055	18906642	45.05	15480491	81.88
IGP-35	tumor	1945	pT3b	N1	5+4	no	47772233	28070845	16179288	45.74	13221765	81.72
IGP-111	tumor	1944	pT2a	N0	3+4	undet.	66531650	36239709	19377696	45.35	16517972	85.24
IGP-59	tumor	1952	pT3a	N0	3+4	undet.	45599115	28307008	15604491	44.27	13303304	85.25
IGP-190	tumor	1944	pT3b	N0	3+4	undet.	51152759	32785278	17908432	46.66	13584580	75.86
IGP-30	tumor	1943	pT2c	N0	4+3	undet.	38367718	26118854	14359187	46.75	12157295	84.67
IGP-39	tumor	1945	pT2c	N0	4+3	undet.	58393579	31414142	16857301	46.48	15687192	93.06
IGP-45	tumor	1937	pT3a	N0	4+3	undet.	54524821	34398989	19937909	44.65	17187437	86.2
IGP-53	tumor	1950	pT3a	N0	4+3	undet.	54881316	35281615	20604272	43.15	16510097	80.13
IGP-54	tumor	1939	pT3a	N1	4+3	undet.	51552904	35445122	21088617	43.38	17107025	81.12
IGP-63	tumor	1940	pT3a	N0	4+3	undet.	50649851	32002122	18243799	44.22	15892695	87.11
IGP-113	tumor	1940	pT3a	N1	4+5	undet.	65487752	33364449	17982737	45.17	15020912	83.53
IGP-27	tumor	1941	pT3b	N0	4+5	undet.	55137370	34092347	18860054	44.74	16189399	85.84
IGP-34	tumor	1938	pT3a	N0	4+5	undet.	71158068	37459691	20314521	45.43	16713681	82.27
IGP-42	tumor	1952	pT4	N1	4+5	undet.	54908905	32513285	18627612	44.94	15648939	84.01
IGP-82	tumor	1942	pT3a	N0	4+5	undet.	45675137	36922926	30128804	52.14	18602576	61.74

## Sheet: Table S2
Table S2: Oligonucleotides for library construction and quantification and BS-MS-primers used for validation of MeDIP-Seq data.
(a) Oligonucleotides used for library construction and quantification
Primer name		Function				Sequence
Multiplex Library P1 Adaptor A		Adpator 1 part 1 for Barcoding Libraries				5'-ATCACCGACTGCCCATAGAGAGGTT-3'
Multiplex Library P1 Adaptor B		Adpator 1 part 2 for Barcoding Libraries				5'-CCTCTCTATGGGCAGTCGGTGAT-3'
Multiplex Library P2 Adaptor BC 001 A		Adaptor 2 part 1 for Barcoding Libraries contains Barcode 001				5'-CGCCTTGGCCGTACAGCAGCCTCTTACACAGAGAATGAGGAACCCGGGGCAGTT-3'
Multiplex Library P2 Adaptor BC 001 B		Adaptor 2 part 2 for Barcoding Libraries contains Barcode 001				5'-CTGCCCCGGGTTCCTCATTCTCTGTGTAAGAGGCTGCTGTACGGCCAAGGCG-3'
Multiplex Library P2 Adaptor BC 002 A		Adaptor 2 part 1 for Barcoding Libraries contains Barcode 002				5'-CGCCTTGGCCGTACAGCAGACCACTCCCTAGAGAATGAGGAACCCGGGGCAGTT-3'
Multiplex Library P2 Adaptor BC 002 B		Adaptor 2 part 2 for Barcoding Libraries contains Barcode 002				5'-CTGCCCCGGGTTCCTCATTCTCTAGGGAGTGGT CTGCTGTACGGCCAAGGCG-3'
Multiplex Library P2 Adaptor BC 003 A		Adaptor 2 part 1 for Barcoding Libraries contains Barcode 003				5'-CGCCTTGGCCGTACAGCAGTATAACCTATAGAGAATGAGGAACCCGGGGCAGTT-3'
Multiplex Library P2 Adaptor BC 003 B		Adaptor 2 part 2 for Barcoding Libraries contains Barcode 003				5'-CTGCCCCGGGTTCCTCATTCTCTATAGGTTATACTGCTGTACGGCCAAGGCG-3'
Multiplex Library P2 Adaptor BC 004 A		Adaptor 2 part 1 for Barcoding Libraries contains Barcode 004				5'-CGCCTTGGCCGTACAGCAGGACCGCATCCAGAGAATGAGGAACCCGGGGCAGTT-3'
Multiplex Library P2 Adaptor BC 004 B		Adaptor 2 part 2 for Barcoding Libraries contains Barcode 004				5'-CTGCCCCGGGTTCCTCATTCTCTGGATGCGGTCCTGCTGTACGGCCAAGGCG-3'
Multiplex Library P2 Adaptor BC 005 A		Adaptor 2 part 1 for Barcoding Libraries contains Barcode 005				5'-CGCCTTGGCCGTACAGCAGCTTACACCACAGAGAATGAGGAACCCGGGGCAGTT-3'
Multiplex Library P2 Adaptor BC 005 B		Adaptor 2 part 2 for Barcoding Libraries contains Barcode 005				5'-CTGCCCCGGGTTCCTCATTCTCTGTGGTGTAAGCTGCTGTACGGCCAAGGCG-3'
Multiplex Library P2 Adaptor BC 006 A		Adaptor 2 part 1 for Barcoding Libraries contains Barcode 006				5'-CGCCTTGGCCGTACAGCAGTGTCCCTCGCAGAGAATGAGGAACCCGGGGCAGTT-3'
Multiplex Library P2 Adaptor BC 006 B		Adaptor 2 part 2 for Barcoding Libraries contains Barcode 006				5'-CTGCCCCGGGTTCCTCATTCTCTGCGAGGGACACTGCTGTACGGCCAAGGCG-3'
Multiplex Library P2 Adaptor BC 007 A		Adaptor 2 part 1 for Barcoding Libraries contains Barcode 007				5'-CGCCTTGGCCGTACAGCAGGGCATAACCCAGAGAATGAGGAACCCGGGGCAGTT-3'
Multiplex Library P2 Adaptor BC 007 B		Adaptor 2 part 2 for Barcoding Libraries contains Barcode 007				5'-CTGCCCCGGGTTCCTCATTCTCTGGGTTATGCCCTGCTGTACGGCCAAGGCG-3'
Multiplex Library P2 Adaptor BC 008 A		Adaptor 2 part 1 for Barcoding Libraries contains Barcode 008				5'-CGCCTTGGCCGTACAGCAGATCCTCGCTCAGAGAATGAGGAACCCGGGGCAGTT-3'
Multiplex Library P2 Adaptor BC 008 B		Adaptor 2 part 2 for Barcoding Libraries contains Barcode 008				5'-CTGCCCCGGGTTCCTCATTCTCTGAGCGAGGATCTGCTGTACGGCCAAGGCG-3'
4994_F (BRD1)		Positive Control for MeDIP enrichment				5-GGGAATATAAGGAGCGCACA-3
4994_R (BRD1)		Positive Control for MeDIP enrichment				5-TCGGTTAAAACGGTCAGGTC-3
8804_F (COQ3)		Negative Control for MeDIP enrichment				5-CGAGGCGTGAGTTATTCCTG-3
8804_R (COQ3)		Negative Control for MeDIP enrichment				5-CTCTTGTGGCTGAGCTCCTT-3
(b) Validation of the MeDIP-Seq approach with BS-MS
Column headings are as follows: (A) name of the amplicon; (B) association of genomic region with a promoter region; (C) genomic location; (D) length of amplicon analysed; (E) CpGs in amplicon; (F) CpGs analysed; (G) left primer sequence; (H) right primer sequence.
AmpliconName	targets promoter region of	UCSCannotationTemplate	TargetLength	CpG in region	CpG analysed	LeftPrimerPlusTag	RightPrimerPlusTag
SQ00001_GSTP1	GSTP1	>chr11:67351401-67352100	556	37	32	aggaagagagGGGGGTTTAGGGGATTTAGGA	cagtaatacgactcactatagggagaaggctCTCCTTCCAACTCTAACCCTAATCT
SQ00002_OlfactoryReceptor	PACSIN3	>chr11: 47208401-47209100	498	25	24	aggaagagagTTTTTTTGGTTTTTAAGGTTTAGGG	cagtaatacgactcactatagggagaaggctTTTCAAAAACTTACCCAAAATTTCC
SQ00003_Type1_01	SIX6	>chr14:60973901-60974600	528	25	20	aggaagagagGGTTTGTATAGATTTGGTAAATTAGAAGG	cagtaatacgactcactatagggagaaggctAACAAAAAAATACTTTCCTCCCCTA
SQ00004_Type1_01	ZNF154	>chr19:58219901-58220600	510	42	30	aggaagagagGGTTATTTTAGTTTTTTTGAGGTGTG	cagtaatacgactcactatagggagaaggctTTCCCTACAAAAAACAACTTTCC
SQ00005_Type1_01	FALSE	>chr3:62353401-62354100	485	27	21	aggaagagagTGTGATATGTTTGGGGTTATTAGGT	cagtaatacgactcactatagggagaaggctACATATTCCTCTAAATCCCAATCTC
SQ00006_Type1_01	SCAND3	>chr6:28556901-28557600	515	24	21	aggaagagagTGTTTTTATTATAGGAATTGGGTTTTT	cagtaatacgactcactatagggagaaggctAACAATTACTCCTTCTTCAACAACAA
SQ00007_Type1_01	ELAVL2	>chr9:23823901-23824600	464	20	18	aggaagagagTTTTAGAGGATGGGTATAATAAATAGGG	cagtaatacgactcactatagggagaaggctAAATAACAAAATAACAATACCCACCA
SQ00008_Type10_01	NLRP8	>chr19:56458901-56459600	533	11	8	aggaagagagTTTAGGTGATGGGTATGGTGTTAGT	cagtaatacgactcactatagggagaaggctTTACTTACCTCTTCCCCAAAAAAAA
SQ00009_Type10_01	TNFRSF10C	>chr8:22939901-22940600	498	7	6	aggaagagagATTAGTGAATTTTGGGTTTTTTTTG	cagtaatacgactcactatagggagaaggctAACAATTCTAACTTTATCCCAACCA
SQ00010_Type11_01	FALSE	>chr11:9090401-9091100	497	8	7	aggaagagagTTTGTAAGGAGGTTTTAAGGGGTAG	cagtaatacgactcactatagggagaaggctCATCAAAAAATTTAAACTATTCTCCAAA
SQ00011_Type11_01	FALSE	>chr16:3015901-3016600	462	21	20	aggaagagagTTAGGTTTAGGTTAGGGGTTATTGG	cagtaatacgactcactatagggagaaggctACAAACACAAAACCTTAAAAACCAC
SQ00012_Type2_01	ALX4	>chr11:44332901-44333600	517	26	20	aggaagagagGGTTTTTATTGGGTATGGAGTGG	cagtaatacgactcactatagggagaaggctCTCTACTCAAACTAATCCCTCCACC
SQ00013_Type2_01	TBX3	>chr12:115123401-115124100	503	17	10	aggaagagagTTAGAGAAAGATAGATTGAAAGGGAAA	cagtaatacgactcactatagggagaaggctCCCACAATTCTTAATTCTAAAAACC
SQ00014_Type2_01	BMP4	>chr14:54422401-54423100	539	42	31	aggaagagagAAATAAGAGAAGTTTTTGGTAGGGG	cagtaatacgactcactatagggagaaggctAACCTAAAAAACCAAAAAAAACC
SQ00015_Type2_01	GREM1	>chr15:33008901-33009600	600	20	19	aggaagagagTTGGTTTGGTTTTGTTTTTTTAGTTA	cagtaatacgactcactatagggagaaggctAAAAATTCTTTCAACCCAAATACC
SQ00016_Type2_01	ONECUT1	>chr15:53083401-53084100	560	34	34	aggaagagagAAGTAAATTTATAGTTTGAGTTTGGTTTA	cagtaatacgactcactatagggagaaggctATTACTCCCAAAACCCTCCTACTAA
SQ00017_Type2_01	FOXC2	>chr16:86599401-86600100	526	25	16	aggaagagagGTTTGTTAGAGGGAATTTTTATTTGG	cagtaatacgactcactatagggagaaggctTCCCAAAAACCTTATAAATAACAATAAT
SQ00018_Type2_01	COL18A1	>chr21:46823901-46824600	538	18	17	aggaagagagTTGAGGTAGGTAGGGATGATGTTAG	cagtaatacgactcactatagggagaaggctCCTCCCAAATAAAAACCCTATTTCT
SQ00019_Type2_01	PHOX2B	>chr4:41748901-41749600	501	30	29	aggaagagagTGGGGTTAGGTTAAAAGTATTTGAG	cagtaatacgactcactatagggagaaggctCCCAACTCAAAAAACTAAAAAAAATC
SQ00020_Type3_01	FALSE	>chr12:65219901-65220600	504	19	18	aggaagagagTTTTGAGTTGGGTTTTAGGTTTTTA	cagtaatacgactcactatagggagaaggctACCAACTAACCCCTACTAAATTTCAC
SQ00021_Type3_01	FALSE	>chr19:17245901-17246600	511	21	18	aggaagagagTTAGAAGTGGGATTGTTAGATTTAGTGA	cagtaatacgactcactatagggagaaggctCATACATAAAAACTACTCCCAAACCC
SQ00022_Type3_01	FALSE	>chr19:48983901-48984600	447	26	19	aggaagagagGGGAGATGAGGTTTTAGGGTAAATA	cagtaatacgactcactatagggagaaggctTCTCAACAAATCCTTTTAACTCCTC
SQ00023_Type3_01	FALSE	>chr6:108439901-108440600	436	19	15	aggaagagagGATTTGGTAGAGGTAGAAGAGAGGTT	cagtaatacgactcactatagggagaaggctAAAACAATTTAAAAAAACCCTTCTCA
SQ00024_Type3_01	CAV2	>chr7:116140401-116141100	567	16	14	aggaagagagTGTTTTTGGTTATTTTTTTGGTTTT	cagtaatacgactcactatagggagaaggctTAAAACAACCCCTCCACACTACTAC
SQ00025_Type3_01	FALSE	>chr7:157360901-157361600	512	17	15	aggaagagagGTTGTTTGTTGTGTTTTTGTTGG	cagtaatacgactcactatagggagaaggctCACAAACCTCAAATCTAAAACTCCC
SQ00026_Type3_01	FALSE	>chr9:37030401-37031100	436	12	8	aggaagagagGGGTTTTATTTTGATTTATAGTGATG	cagtaatacgactcactatagggagaaggctCATACTAACAACATCCCTAATCTTTCC
SQ00027_Type3_01	FALSE	>chr9:77114401-77115100	437	19	14	aggaagagagTTTGGGTAATTGGAGAGTAGAGAATTT	cagtaatacgactcactatagggagaaggctTTTCTCAAAATAAACATAAAAACCA
SQ000028_Type4_01	FALSE	>chr1:159409401-159410100	521	5	4	aggaagagagTTTTATTGGGATTATGTGATTTTTATG	cagtaatacgactcactatagggagaaggctACAATCAACCCAATACTACAAACCC
SQ00029_Type4_01	FALSE	>chr16:7222901-7223600	426	6	5	aggaagagagGATATTTGTTGTGGATGGTGGTATT	cagtaatacgactcactatagggagaaggctAAACAATTAACTACAAAACTAAAATTTACC
SQ00030_Type4_01	FALSE	>chr18:37892901-37893600	450	10	7	aggaagagagTAATTGTTTTGTGGAAATTAAGAAA	cagtaatacgactcactatagggagaaggctTTTTAACAAAATCTACAATAATACCCAA
SQ00031_Type4_01	FALSE	>chr20:56236901-56237600	583	23	22	aggaagagagGGGTTTGAGTTTTTAGTAGGTAGGG	cagtaatacgactcactatagggagaaggctACACTTTATACATCTATACCACCCTCAA
SQ00032_Type4_01	FALSE	>chr5:85072901-85073600	450	5	3	aggaagagagTTTATAGGTTAGGGATTAGGGAATTG	cagtaatacgactcactatagggagaaggctAAACAACACAAATAAAACAACCTAA
SQ00033_Type4_01	FALSE	>chr8:32020901-32021600	402	4	4	aggaagagagTTTTTTATTAGTAGTTTTGGAAAGAGAG	cagtaatacgactcactatagggagaaggctAACATCATCAAAATTTAAAACCACA
SQ00034_Type4_01	FALSE	>chr8:4609901-4610600	444	5	4	aggaagagagAATGATTTTTTTTGGTTTTGTTGTG	cagtaatacgactcactatagggagaaggctAAAACTCAAAATTAAAACTCTATACCCAA
SQ00035_Type4_01	FALSE	>chrX:151073401-151074100	482	12	9	aggaagagagTTTTGATAGGGTTTTTGGATTTAGG	cagtaatacgactcactatagggagaaggctTATAACCCACCCCAATTAAACATAA
SQ00036_Type5_01	SFRS5	>chr14:70235401-70236100	503	12	11	aggaagagagTTTTATAGGTGGAGTATTTTTGAGGAA	cagtaatacgactcactatagggagaaggctAACCCTAAAACATAAAACAAACTAAATC
SQ00037_Type5_01	EEF2	>chr19:3982901-3983600	434	25	23	aggaagagagGGGTTTTAGTTGTAGTTTTAGTAGGG	cagtaatacgactcactatagggagaaggctACCAAATATATAACTCCTATCCCCC
SQ00038_Type5_01	KLK4	>chr19:51411401-51412100	491	29	23	aggaagagagGGAGTTAGATGGTGGAGGTTAGTTT	cagtaatacgactcactatagggagaaggctACCCTATATATCTCTATCTCCCCCTT
SQ00039_Type5_01	ZNF649	>chr19:52405901-52406600	518	10	6	aggaagagagTTTTTAGTTAAGAATTGTTTGAGAATGA	cagtaatacgactcactatagggagaaggctTCAAATATACCCACATAATAAAACCAAC
SQ00040_Type5_01	5S-RNA, AC022910.2	>chr8:3557901-3558600	559	12	11	aggaagagagGTTTTTTGGTGAGTTTTGATTGTTT	cagtaatacgactcactatagggagaaggctACCATACCACCCTAAATACACCTAATC
SQ00041_Type6_01	miR 9-1	>chr1:156389901-156390600	505	36	25	aggaagagagGGTATTAGAAATTTTTTGGGTTTGG	cagtaatacgactcactatagggagaaggctAAAATCTCTCTCCTCCTCTTATATCCT
SQ00042_Type6_01	miR 34b	>chr11:111385401-111386100	416	24	18	aggaagagagGGTAGGGGTTGGTATTAATTTGG	cagtaatacgactcactatagggagaaggctCCATTACAATTTCTCCTAAAAAAAACTC
SQ00043_Type6_01	miR 184	>chr15:79501901-79502600	432	16	14	aggaagagagTTTGAATAAGTAAAGTGGAGATTTTATTG	cagtaatacgactcactatagggagaaggctACCAAAACAAAATAAAAAAACACAA
SQ00044_Type6_01	miR 9-2	>chr5:87963401-87964100	464	16	14	aggaagagagTTGAAAGAAGGAGAAAAGGGTTATT	cagtaatacgactcactatagggagaaggctAAACAATAACAAAATACCTTCCATC
SQ00045_Type6_01	miR 23b	>chr9:97846401-97847100	423	16	14	aggaagagagAGGAATTATGTGTGTTAGGAAAGGG	cagtaatacgactcactatagggagaaggctAAAAAACAAACTTACAACCCCTAAA
SQ00046_Type7_01	snoU13, AL157818.	>chr13:95861401-95862100	492	4	4	aggaagagagTTTAGAATGGTTTTATTTGTGGTGG	cagtaatacgactcactatagggagaaggctAAAACCCCCTTAACTAAACCTAAAA
SQ00047_Type8_01	SFXN4	>chr10:120925901-120926600	526	10	9	aggaagagagGAGTTTAGGATTGGGGGATTTAGTA	cagtaatacgactcactatagggagaaggctACAATCCAAAATAAAAAAACAAACC
SQ00048_TYPE9_01	MRPL44	>chr2:224822401-224823100	438	6	3	aggaagagagTTTTTATGGTTTTGTATATATGGGTTT	cagtaatacgactcactatagggagaaggctTCCTCCTATATACTTTAAATCATCTCTAA
Design statistics of genomic regions analyzed for methylation (Validation of MeDIP approach with BS-MS)
Number of DNA samples			7
number of genomic regions			48
number of amplicons			48
number of CpG units			697
median amplicon length			500bp (min=402; max=600)
median CpG/amplicon			14CpG/amplicon (min=4; max=28)
(c) BS-MS analyses in micro- and macrodissected samples
Column headings are as follows: (A) name of the amplicon; (B) association of genomic region with a promoter region; (C) genomic location; (D) length of amplicon analysed; (E) CpGs in amplicon; (F) CpGs analysed; (G) left primer sequence; (H) right primer sequence.
AmpliconName	targets promoter region of	UCSCannotationTemplate	TargetLength	CpG in region	CpG analysed	LeftPrimerPlusTag	RightPrimerPlusTag
SQ00001_SEQ2	TMEM51	>chr1:15480901-15481600	460	30	26	aggaagagagGGTTTTAGAGGGGAAAGTTTTTTA	cagtaatacgactcactatagggagaaggctTTTCTTCATCTATAAAACTAACATAACAAC
SQ00010_SEQ2	AL132857.1	>chr14:36991901-36992600	484	34	29	aggaagagagTTGGAGGGAGAGAAAGGAGTTTTTT	cagtaatacgactcactatagggagaaggctAAACATCTATATCTCCAAACTTATCCAAA
SQ00011_SEQ2	SIX6	>chr14:60973901-60974600	528	25	20	aggaagagagGGTTTGTATAGATTTGGTAAATTAGAAGG	cagtaatacgactcactatagggagaaggctAACAAAAAAATACTTTCCTCCCCTA
SQ00012_SEQ2	ANXA2	>chr15:60690901-60691600	481	16	7	aggaagagagTTTTTTTTATGATTGTTGGGGTGT	cagtaatacgactcactatagggagaaggctTCACATACAACAAATAAATATCTACCTACA
SQ00013_SEQ2	KRT23	>chr17:39093401-39094100	551	12	11	aggaagagagTGGTTTGGAATTAGAAAGGTTAGAA	cagtaatacgactcactatagggagaaggctAAAACAAAATCTCAAATCCCAAAAT
SQ00014_SEQ2	TMEM91	>chr19:41882401-41883100	437	36	21	aggaagagagTTTGGAAGGTTTTTAAGTTTTTTG	cagtaatacgactcactatagggagaaggctAAACTACAATTCTCCAAAAATTCCC
SQ00015_SEQ2	AOX1,AC080164.1	>chr2:201450401-201451100	475	39	26	aggaagagagAAAGTAATGTTTTAGGATTTATAATGTTTG	cagtaatacgactcactatagggagaaggctACAAAAACTCCTCTCTACCCC
SQ00016_SEQ2	ARL4C	>chr2:235404401-235405100	592	47	35	aggaagagagAAGGGTATTAGTTGTTATTTTTGGG	cagtaatacgactcactatagggagaaggctACTCCTTAAATCACCAATCCTACAT
SQ00018_SEQ2	SLC2A2	>chr3:170745901-170746600	518	30	27	aggaagagagTTGTTAGTGATATGATATTTTGTAGGAA	cagtaatacgactcactatagggagaaggctAAACTAACTTCACCACAACCAAAAA
SQ00019_SEQ2	GHSR	>chr3:172165401-172166100	509	38	29	aggaagagagGGTTTGTTTGTGGTTTTGGTTTT	cagtaatacgactcactatagggagaaggctTCTTCCTCTACATACCCCTAAACCT
SQ00002_SEQ2	MPPED2	>chr11:30605401-30606100	475	26	17	aggaagagagGGGATTTTGGAATTTGTTTGTTT	cagtaatacgactcactatagggagaaggctTATATATAATTCATAAAACACCCCC
SQ00021_SEQ2	AC092502.2	>chr3:62353401-62354100	527	29	22	aggaagagagGTTTATTTTGGGGTTTTTTGGG	cagtaatacgactcactatagggagaaggctTCACCAAACTTAATAAAACAAAAATTC
SQ00022_SEQ2	DDIT4L	>chr4:101111901-101112600	493	17	14	aggaagagagGATTTGTGTATTTTTTTGTTTTGGG	cagtaatacgactcactatagggagaaggctCAAAAATCCTCCCAACAAAACTC
SQ00023_SEQ2	KIT	>chr4:55522901-55523600	417	18	16	aggaagagagAAGGATTTATTATGAGATTGTGGGT	cagtaatacgactcactatagggagaaggctCAAACCTATTAAAAACTCCTAACACC
SQ00024_SEQ2	AC095061.1	>chr4:61527401-61528100	513	5	5	aggaagagagTGATATGGTTTGGTTGTGTTTTTAT	cagtaatacgactcactatagggagaaggctTTCCTAACCACTACACCTAATCACC
SQ00025_SEQ2	PDGFRB	>chr5:149535401-149536100	400	14	12	aggaagagagGTTATTTTGGGGGAAAGGTTGTAG	cagtaatacgactcactatagggagaaggctAACCACAAAAATAATCAAAATCTCC
SQ00027_SEQ2	SEMA5A, SNORD123	>chr5:9546401-9547100	551	35	26	aggaagagagTTGAGTATTTAGTAAGGTTTAAGGATTTTG	cagtaatacgactcactatagggagaaggctCTAACTTTTAAAAACTCCCTCCCC
SQ00028_SEQ2	HIST1H1A, HIST1H1PS2	>chr6:26017401-26018100	432	22	18	aggaagagagGTGGTTTTTTTGAGTTTTTTAGATGT	cagtaatacgactcactatagggagaaggctCACCATATCTAAAACAATACCTCCC
SQ00029_SEQ2	HIST1H4F	>chr6:26240401-26241100	497	35	30	aggaagagagTTTTTTTTAAGGTAATAGTGTAGGGGA	cagtaatacgactcactatagggagaaggctAAATAAAACTCAACCACCAAAACC
SQ00003_SEQ2	WIT1, WT1	>chr11:32458901-32459600	523	16	12	aggaagagagGGTTGTAGGGAATTTTTTTTATTTTT	cagtaatacgactcactatagggagaaggctTCACTACCAATTACCCTAAAAACCC
SQ00030_SEQ2	ZSCAN12	>chr6:28366901-28367600	452	24	21	aggaagagagAATTTGAAGTGAGGAAGGTTTAGGA	cagtaatacgactcactatagggagaaggctACCTTTATAAATCACTTTTAATAAATTCC
SQ00031_SEQ2	ZSCAN12	>chr6:28367401-28368100	516	31	26	aggaagagagGGAATTTATTAAAAGTGATTTATAAAGGT	cagtaatacgactcactatagggagaaggctAATTTTCTAACATATAATCATACATCAACA
SQ00032_SEQ2	SCAND3	>chr6:28556901-28557600	515	24	21	aggaagagagTGTTTTTATTATAGGAATTGGGTTTTT	cagtaatacgactcactatagggagaaggctAACAATTACTCCTTCTTCAACAACAA
SQ00033_SEQ2	HLA-J, HCG4P3	>chr6:29974401-29975100	453	38	29	aggaagagagGGAGATTTTGGTTTTAATTGAAGATG	cagtaatacgactcactatagggagaaggctCCCACTCCATAAAATATTTCAACAC
SQ00034_SEQ2	HMGCLL1	>chr6:55443901-55444600	493	21	19	aggaagagagGGTGTATTGGTTGTGAGGATTAGAG	cagtaatacgactcactatagggagaaggctAACTATCTTTTCCTTTTCATTAAACTATTA
SQ00035_SEQ2	DST, BEND6	>chr6:56818401-56819100	493	23	19	aggaagagagGGAAAGAGAATTTTTTTTGATTTTGA	cagtaatacgactcactatagggagaaggctCAATCTCCCAAATTTAAATAACCAC
SQ00036_SEQ2	AC069281.2	>chr7:100106901-100107600	408	11	10	aggaagagagGTTTTGTGGATTAGGAATTTAGGGT	cagtaatacgactcactatagggagaaggctATTACAAACATAAACCACCACACCT
SQ00037_SEQ2	CAV2	>chr7:116140401-116141100	441	23	21	aggaagagagTTTGGGATAAGAGGAGAGTAGGGGGTA	cagtaatacgactcactatagggagaaggctAACCAAAAATTCTTAACCAAATTCC
SQ00038_SEQ2	AC084864.2	>chr7:129424901-129425600	527	16	13	aggaagagagAGTTTTGAGGATTAGGTTTTAGGGT	cagtaatacgactcactatagggagaaggctAACATTCTCATCCAAAAAAAACACA
SQ00039_SEQ2	FALSE	>chr7:157481401-157482100	460	41	33	aggaagagagGTTTGTTAGAATTTTTTTGTGGTA	cagtaatacgactcactatagggagaaggctAAAAAACTAAAAACTCTTCCTTTCACC
SQ00004_SEQ2	DTX4	>chr11:58940401-58941100	596	29	23	aggaagagagAGGAAGTTTGGGGATAGTTTTTTTT	cagtaatacgactcactatagggagaaggctTAATTTTACAAACCCAACTTCAACC
SQ00040_SEQ2	CHN2	>chr7:29185401-29186100	489	21	18	aggaagagagAAAAGTTTTTAGTATTAATAGGGGAGAAA	cagtaatacgactcactatagggagaaggctCACTTCACAAAAAACTACTTCCACC
SQ00041_SEQ2	NKX2-6	>chr8:23563901-23564600	392	27	25	aggaagagagGGGTTGTATAGTAAGGATTTTATTTTTAAT	cagtaatacgactcactatagggagaaggctCAAACAAACCCAAACTCTAAAACAAAC
SQ00005_SEQ2	CHRM1	>chr11:62690901-62691600	527	37	32	aggaagagagAATTGAGATTTAGAGAGGGGGTTTA	cagtaatacgactcactatagggagaaggctCCCAAACTTAACTAACTCACCCTTA
SQ00006_SEQ2	CHST11	>chr12:104851901-104852600	541	35	31	aggaagagagTATTGTAGTTTTGGAGGAAATTTTGG	cagtaatacgactcactatagggagaaggctAAAAACAAAAATAAAAAACACCAACC
SQ00007_SEQ2	AL160397.2, AL160397.1	>chr13:47530401-47531100	573	3	1	aggaagagagAGAATAGTTTTAGGTTTATAGTAAATTGAG	cagtaatacgactcactatagggagaaggctAAAAACAACTAAAATACCTTCCAAT
SQ00008_SEQ2	SALL2	>chr14:22004401-22005100	459	12	11	aggaagagagTGGGGGTTTTTAAGTTTAAGTTTGT	cagtaatacgactcactatagggagaaggctACTCTCAATTCAACCCAACAATAAA
SQ00009_SEQ2	COCH	>chr14:31344401-31345100	500	24	22	aggaagagagTATTTGTTTTTTTTATGGTAGGGGG	cagtaatacgactcactatagggagaaggctTAAAAAATACTTAACCCTCATTCCT
Design statistics of genomic regions analyzed for methylation (BS-MS analyses in micro- and macrodissected samples)
Number of DNA samples			9
number of genomic regions			38
number of amplicons			38
number of CpGs analysed			778
median amplicon length			493bp (min=392, max=596)
median CpG/amplicon analysed			21CpG/amplicon (min=1, max=35)
(d) Validation of markers with BS-MS in 94 prostate samples.
Column headings are as follows: (A) name of the amplicon; (B) association of genomic region with a promoter region; (C) genomic location; (D) length of amplicon analysed; (E) CpGs in amplicon; (F) CpGs analysed; (G) left primer sequence; (H) right primer sequence.
AmpliconName	targets promoter region of	UCSCannotationTemplate	TargetLength	CpG in region	CpG analysed	LeftPrimerPlusTag	RightPrimerPlusTag
SEQ3_3	TAC1	>chr7:97360901-97361600	514	35	28	aggaagagagGGTGTTGAGTTTTTTTGGTTTTTT	cagtaatacgactcactatagggagaaggctAATACCTACAATTATTTAACCATCCTAA
SEQ2_19	GHSR	>chr3:172165401-172166100	509	38	29	aggaagagagGGTTTGTTTGTGGTTTTGGTTTT	cagtaatacgactcactatagggagaaggctTCTTCCTCTACATACCCCTAAACCT
SEQ2_39	FALSE	>chr7:157481401-157482100	460	41	33	aggaagagagGTTTGTTAGAATTTTTTTGTGGTA	cagtaatacgactcactatagggagaaggctAAAAAACTAAAAACTCTTCCTTTCACC
TMP1	FALSE	>chr1:149032901-149033600	384	13	6	aggaagagagTTAATGAAGGGATTTGAATTGTGTTATT	cagtaatacgactcactatagggagaaggctTCATCCCCAATAATATTTCCTATTCTA
TMP2	FALSE	>chr16:46413901-46414600	294	12	5	aggaagagagGAATGGAATGGAATGGAATTATTTT	cagtaatacgactcactatagggagaaggctAATTTCCTTTACTTCCCTTTAATAATCA
Design statistics of genomic regions analyzed for methylation (Validation of markers with BS-MS)
Number of DNA samples			96
number of genomic regions			5
number of amplicons			5
number of CpGs analysed			101
median amplicon length			460bp (min 294; max 514)
median CpG/amplicon analysed			28CpG/amplicon (min=5, max=41)

## Sheet: Table S3
Table S3 Top 100 differentially methylated regions between tumor and normal (a) and between FUS+ and FUS- samples (b).
Column headings are as follows: (A) genomic location, (B) average rpm value of all tumor samples in this region, (C) average rpm value of all tumor samples in this region, (D) Mann-Whitney p-value, (E) TSS that is located within 2kb range.
Table S3a Top100 differentially methylated regions separating normal and tumor samples.
LOCATION	tumor_mean	normal_mean	MW_p_value	TSS_within_2kb
chr7:157481501-157482000	0.606586	0.0411842	7.90155e-19	FALSE
chr7:116140001-116140500	0.599262	0.0455436	9.67207e-19	CAV2|AC002066.1
chr14:31344501-31345000	0.657872	0.0591561	1.27339e-18	COCH
chr9:37002501-37003000	0.914583	0.0698774	1.34826e-18	FALSE
chr8:70947001-70947500	0.738931	0.0480135	1.533e-18	FALSE
chr7:157484001-157484500	1.27426	0.105113	1.64234e-18	FALSE
chr6:26017501-26018000	1.1102	0.147833	1.6822e-18	HIST1H1A|HIST1H1PS2
chr9:112810501-112811000	1.0872	0.141053	1.71331e-18	AKAP2
chr12:65220001-65220500	1.13972	0.085243	1.83433e-18	TBC1D30
chr12:54441001-54441500	0.909513	0.0860179	1.87528e-18	FALSE
chr6:29974501-29975000	1.21406	0.0876363	1.9815e-18	HCG4P3|HLA-J
chr4:185937001-185937500	0.906812	0.183734	1.99093e-18	FALSE
chr6:56818501-56819000	1.19282	0.203202	2.38921e-18	DST|BEND6
chr11:58940501-58941000	1.1855	0.135724	2.42995e-18	DTX4
chr9:126774501-126775000	0.553694	0.0290736	2.49663e-18	LHX2|RP11-85O21.4
chr12:104852001-104852500	0.885911	0.0726073	2.49874e-18	CHST11
chr4:85414501-85415000	0.770039	0.0918139	2.52145e-18	FALSE
chr7:143579501-143580000	0.788043	0.0932141	2.54764e-18	FAM115A
chr3:170746001-170746500	1.08807	0.0981935	2.56091e-18	SLC2A2
chr2:235404501-235405000	1.01303	0.0986644	2.64793e-18	ARL4C
chr4:85402001-85402500	1.0356	0.18858	2.73594e-18	FALSE
chr7:29185501-29186000	1.32185	0.153737	2.88107e-18	CPVL|CHN2
chr4:41882501-41883000	1.16139	0.199312	2.90065e-18	RP11-457P14.4
chr3:138154001-138154500	0.752232	0.0552872	2.9367e-18	ESYT3
chr17:43974501-43975000	1.09616	0.1048	2.99151e-18	FALSE
chr1:15481001-15481500	0.827035	0.0613899	3.18525e-18	TMEM51
chr1:203598501-203599000	0.895882	0.0628418	3.21277e-18	FALSE
chr13:100641501-100642000	1.10077	0.155238	3.28277e-18	FALSE
chr3:172165501-172166000	1.22693	0.184112	3.34653e-18	GHSR
chr4:41868001-41868500	0.875034	0.138205	3.43536e-18	FALSE
chr11:3181501-3182000	1.00015	0.0667037	3.58211e-18	FALSE
chr11:62691001-62691500	0.924096	0.0926257	3.67794e-18	CHRM1
chr7:116140501-116141000	0.870533	0.138693	3.71259e-18	CAV2|AC002066.1
chr19:17246001-17246500	1.29775	0.240788	3.77334e-18	FALSE
chr14:36992001-36992500	1.25425	0.213508	3.85838e-18	FALSE
chr3:25469501-25470000	0.682383	0.0946432	4.36182e-18	RARB|AC098477.2
chr1:119528501-119529000	1.18222	0.348437	4.37252e-18	TBX15
chr2:201450501-201451000	0.784428	0.0338324	4.40122e-18	AOX1|AC080164.1
chr20:50721001-50721500	1.17415	0.153076	4.54065e-18	ZFP64
chr7:127808001-127808500	0.637611	0.0741494	4.54785e-18	FALSE
chr1:197889001-197889500	0.791883	0.121156	4.73707e-18	FALSE
chr9:126777501-126778000	0.936515	0.137352	4.75601e-18	LHX2
chr6:150286001-150286500	0.779836	0.0919853	4.94407e-18	ULBP1
chr1:24648501-24649000	0.944952	0.0740116	4.96799e-18	GRHL3|RP11-10N16.3
chr2:237079501-237080000	1.02256	0.204505	5.02248e-18	FALSE
chr1:119527001-119527500	0.873333	0.0941746	5.10463e-18	FALSE
chr20:37356001-37356500	1.03408	0.159962	5.11774e-18	FALSE
chr4:85402501-85403000	0.760475	0.12122	5.155e-18	FALSE
chr19:16436501-16437000	0.552835	0.0451609	5.28409e-18	KLF2
chr6:127836001-127836500	0.993998	0.138322	5.3783e-18	AL096711.1
chr1:58716001-58716500	0.816287	0.121436	5.45952e-18	DAB1
chr1:146551501-146552000	0.7517	0.0705194	5.6005e-18	U1|AL596177.2
chr3:48632001-48632500	0.909787	0.160245	5.75145e-18	COL7A1
chr15:90039501-90040000	0.693966	0.0628867	5.77387e-18	RHCG
chr20:20345501-20346000	1.29396	0.269997	5.79569e-18	FALSE
chr14:29254501-29255000	0.812591	0.108646	5.81459e-18	FALSE
chr10:94822001-94822500	0.683342	0.0819741	5.89877e-18	CYP26C1|RP11-348J12.2
chr18:56939501-56940000	0.489142	0.0472221	6.16637e-18	RAX
chr7:151107501-151108000	0.729801	0.0773992	6.22382e-18	WDR86|RP4-555L14.5
chr1:119543001-119543500	1.01735	0.123915	6.38781e-18	RP4-712E4.1|RP4-712E4.2
chr20:50721501-50722000	0.448938	0.0279457	6.41464e-18	ZFP64
chr19:48983501-48984000	1.13102	0.134671	6.42004e-18	AC008403.1
chr3:125899501-125900000	0.633565	0.0755878	6.42956e-18	ALDH1L1|RP11-124N2.3
chr7:129422001-129422500	1.52755	0.201344	6.67408e-18	FALSE
chr2:27529501-27530000	0.697902	0.0529181	6.67531e-18	TRIM54|UCN
chr6:28367501-28368000	0.864568	0.121378	6.75056e-18	ZSCAN12
chr5:140810501-140811000	1.58982	0.409679	6.90361e-18	PCDHGA12
chr11:20619001-20619500	0.666936	0.144727	6.96965e-18	SLC6A5
chr9:135620501-135621000	1.69389	0.47384	7.11516e-18	FALSE
chr7:19146001-19146500	1.15703	0.122488	7.2614e-18	FALSE
chr7:45613501-45614000	0.578603	0.0663853	7.57845e-18	ADCY1
chr2:73147501-73148000	0.97578	0.0968772	7.83494e-18	FALSE
chr4:11429501-11430000	1.05848	0.132471	7.87086e-18	HS3ST1
chr6:28367001-28367500	1.19198	0.108295	7.89635e-18	ZSCAN12
chr10:102896001-102896500	0.824522	0.119766	8.05837e-18	FALSE
chr1:146556501-146557000	1.03202	0.158094	8.10087e-18	RP11-325P15.2
chr14:85998001-85998500	0.992722	0.0738159	8.11368e-18	AL049775.1|FLRT2
chr6:137809501-137810000	0.998158	0.121143	8.18889e-18	FALSE
chr14:85997501-85998000	0.533749	0.0499856	8.33519e-18	AL049775.1|FLRT2
chr9:135462001-135462500	1.13542	0.162841	8.36658e-18	FALSE
chr7:96632001-96632500	0.959422	0.204733	8.37531e-18	DLX6AS
chr1:70035001-70035500	0.9122	0.0903829	8.40371e-18	LRRC7
chr7:157478501-157479000	0.521932	0.0580467	8.41941e-18	FALSE
chr12:54440501-54441000	1.10834	0.149238	8.45395e-18	FALSE
chr17:41363501-41364000	0.919364	0.100511	8.57454e-18	TMEM106A
chr7:97361001-97361500	1.25743	0.141439	8.65345e-18	TAC1
chr2:87016001-87016500	0.834602	0.147516	8.80968e-18	CD8A
chr12:54447501-54448000	0.843345	0.117288	8.85938e-18	HOXC4
chr5:77268001-77268500	0.862448	0.19367	9.04143e-18	FALSE
chr3:68980501-68981000	1.03117	0.152533	9.10641e-18	FAM19A4
chr12:122016501-122017000	0.750339	0.0696489	9.12731e-18	KDM2B
chr4:16085501-16086000	1.00595	0.235275	9.41447e-18	PROM1
chr19:46916501-46917000	0.501811	0.0499815	9.66876e-18	CCDC8
chr6:29974001-29974500	0.810298	0.148977	9.75218e-18	HCG4P3|HLA-J
chr3:154145501-154146000	1.13391	0.153007	1.00178e-17	GPR149
chr10:94822501-94823000	0.43765	0.0296205	1.01192e-17	CYP26C1
chr2:220117501-220118000	0.960141	0.115881	1.04435e-17	TUBA4A|TUBA4B
chr7:32981501-32982000	0.947759	0.163845	1.04848e-17	RP9P
chr2:45169501-45170000	0.844785	0.106241	1.06643e-17	SIX3|AC012354.5
chr10:102905501-102906000	0.581343	0.0848402	1.07471e-17	FALSE
Table S3b Top100 differentially methylated regions separating FUS+ and FUS- samples.
LOCATION	nonfusion_mean	fusion_mean	normal_mean	MW_p_value	TSS_within_2kb
chr1:149033001-149033500	1.687	3.43882	3.39695	2.51487e-10	FALSE
chr16:46414001-46414500	3.1575	5.98353	5.46652	8.80206e-10	FALSE
chr16:33879501-33880000	3.0205	5.76941	5.50653	2.38913e-09	FALSE
chr16:33898001-33898500	4.021	7.71529	7.48832	5.65847e-09	FALSE
chr22:16854501-16855000	3.293	6.73471	6.39888	8.42483e-09	FALSE
chr7:61791001-61791500	2.7865	6.42176	5.95088	8.42483e-09	FALSE
chr16:46449001-46449500	3.5585	6.91471	6.98807	1.21971e-08	FALSE
chr16:46455501-46456000	2.832	5.62412	5.1549	1.21971e-08	FALSE
chr7:61743001-61743500	3.0815	6.00588	5.84386	1.21971e-08	FALSE
chr10:131503001-131503500	1.444	0.665294	0.974185	1.74784e-08	FALSE
chr16:33890501-33891000	1.93	3.96824	3.7644	1.74784e-08	FALSE
chr22:16853001-16853500	3.4925	6.70235	6.18008	1.74784e-08	FALSE
chr7:61796501-61797000	3.3715	6.65529	6.84921	1.74784e-08	FALSE
chr7:61798501-61799000	2.7395	6.12706	5.63091	1.74784e-08	FALSE
chr1:61892001-61892500	1.263	0.629412	0.726221	2.452e-08	FALSE
chrY:28801001-28801500	6.224	8.15412	7.64109	2.452e-08	FALSE
chr10:38876501-38877000	3.0005	5.76118	5.51863	3.42023e-08	FALSE
chr16:34183001-34183500	4.4165	7.87765	7.96059	3.42023e-08	FALSE
chr16:46437501-46438000	4.0975	8.90824	9.08727	3.42023e-08	FALSE
chr16:46439001-46439500	4.2295	8.10059	7.74121	3.42023e-08	FALSE
chr16:46498001-46498500	3.8835	8.01412	7.91409	3.42023e-08	FALSE
chr7:61749501-61750000	5.13	9.39176	9.54876	3.42023e-08	FALSE
chrY:13834501-13835000	5.708	8.59176	8.60922	3.42023e-08	FALSE
chr16:46453001-46453500	3.192	6.58588	6.52092	4.69024e-08	FALSE
chr16:46497501-46498000	2.397	4.83706	4.7668	4.69024e-08	FALSE
chr16:33877501-33878000	2.397	4.98471	5.14966	6.38778e-08	FALSE
chr16:33884501-33885000	4.411	7.48176	7.53008	6.38778e-08	FALSE
chr16:46454501-46455000	3.286	6.46176	6.5062	6.38778e-08	FALSE
chr2:89833501-89834000	3.5185	6.44647	6.86463	6.38778e-08	FALSE
chr7:61793501-61794000	2.5815	5.09765	5.17394	6.38778e-08	FALSE
chrY:13802501-13803000	3.8235	5.82765	5.61756	6.38778e-08	FALSE
chr10:42815501-42816000	3.3155	5.62118	5.60314	8.60087e-08	FALSE
chr16:33871001-33871500	3.9495	7.11059	7.06521	8.60087e-08	FALSE
chr16:33882501-33883000	2.0755	4.23706	4.2404	8.60087e-08	FALSE
chr16:34195001-34195500	3.7845	7.09353	6.96622	8.60087e-08	FALSE
chr16:34196501-34197000	3.213	5.75529	5.74654	8.60087e-08	FALSE
chr16:46444501-46445000	1.855	3.96647	3.74131	8.60087e-08	FALSE
chr2:89831001-89831500	1.588	3.24294	3.45955	8.60087e-08	FALSE
chr20:29811501-29812000	3.8075	6.20824	6.28349	8.60087e-08	FALSE
chr22:16854001-16854500	4.089	7.69412	7.49393	8.60087e-08	FALSE
chr22:16855501-16856000	3.2185	5.95941	6.14821	8.60087e-08	FALSE
chr10:39105501-39106000	5.111	8.04	7.92842	1.15055e-07	FALSE
chr10:39145501-39146000	5.12	7.59941	7.5684	1.15055e-07	AL590623.1
chr10:42666001-42666500	2.4055	4.68294	4.81392	1.15055e-07	FALSE
chr16:33881501-33882000	3.6435	6.29647	6.3265	1.15055e-07	FALSE
chr16:46396501-46397000	5.406	9.70824	9.50345	1.15055e-07	FALSE
chr16:46425001-46425500	2.86	5.71294	4.99982	1.15055e-07	FALSE
chr16:46443501-46444000	4.538	7.7	7.46511	1.15055e-07	FALSE
chr16:46450001-46450500	4.1875	7.99588	8.21924	1.15055e-07	FALSE
chr22:16860501-16861000	3.7805	6.70941	6.65213	1.15055e-07	FALSE
chr22:16861001-16861500	3.91	7.34118	7.39897	1.15055e-07	FALSE
chr7:61750001-61750500	3.584	6.69176	6.5912	1.15055e-07	FALSE
chr7:61787001-61787500	3.9665	7.82294	7.95882	1.15055e-07	FALSE
chr10:42383501-42384000	8.217	14.4065	13.7781	1.52401e-07	FALSE
chr16:33891501-33892000	3.1735	6.71	6.68851	1.52401e-07	FALSE
chr16:34190501-34191000	2.9465	5.57176	5.23123	1.52401e-07	FALSE
chr16:46452501-46453000	2.9975	6.51765	6.46497	1.52401e-07	FALSE
chr20:29807501-29808000	3.5295	5.75235	5.63406	1.52401e-07	FALSE
chr20:29811001-29811500	4.6225	7.19647	6.92667	1.52401e-07	FALSE
chr21:10837501-10838000	4.512	6.95765	7.06234	1.52401e-07	FALSE
chr7:61749001-61749500	4.1495	7.47471	7.6137	1.52401e-07	FALSE
chr7:61791501-61792000	4.2705	7.83529	7.76428	1.52401e-07	FALSE
chr7:61800501-61801000	2.6845	5.25176	5.14939	1.52401e-07	FALSE
chrY:13649501-13650000	3.992	6.31647	6.00524	1.52401e-07	FALSE
chr3:53529501-53530000	0.801	0.0152941	0.0492939	1.53558e-07	CACNA1D
chr10:38785001-38785500	4.493	6.78	6.73036	2.00687e-07	FALSE
chr10:42598001-42598500	11.4485	17.5206	17.0481	2.00687e-07	FALSE
chr16:46432001-46432500	1.318	3.05059	2.96958	2.00687e-07	FALSE
chr16:46438001-46438500	4.2725	8.16588	8.33767	2.00687e-07	FALSE
chr16:46449501-46450000	3.672	6.99176	6.53373	2.00687e-07	FALSE
chr21:10814501-10815000	4.875	7.65588	7.60548	2.00687e-07	FALSE
chr7:61745501-61746000	3.591	6.85941	6.94823	2.00687e-07	FALSE
chr7:61752001-61752500	4.211	7.57941	7.80606	2.00687e-07	FALSE
chr7:61754001-61754500	3.3805	6.63765	6.9339	2.00687e-07	FALSE
chr7:61802001-61802500	3.56	6.86412	7.25483	2.00687e-07	FALSE
chr15:33011501-33012000	1.0995	0.105294	0.12702	2.36035e-07	GREM1
chr10:39142501-39143000	5.748	8.76353	8.2626	2.6205e-07	AL590623.1
chr10:39153501-39154000	5.6785	8.97647	8.96352	2.6205e-07	FALSE
chr10:42383001-42383500	6.224	9.52235	9.51558	2.6205e-07	FALSE
chr16:33895501-33896000	4.079	7.37824	6.99446	2.6205e-07	FALSE
chr16:46412001-46412500	3.459	6.27235	5.98584	2.6205e-07	FALSE
chr16:46433501-46434000	1.803	4.10118	3.65606	2.6205e-07	FALSE
chr16:46452001-46452500	4.1295	7.71647	8.04596	2.6205e-07	FALSE
chr2:92267501-92268000	3.526	5.91	5.89699	2.6205e-07	FALSE
chr21:10833001-10833500	3.875	6.10765	5.96935	2.6205e-07	FALSE
chr22:16852001-16852500	3.943	7.24529	7.3554	2.6205e-07	FALSE
chrY:13845001-13845500	3.833	6.35765	6.06457	2.6205e-07	FALSE
chr5:88675501-88676000	0.0335	0.211765	0.0958906	2.84659e-07	FALSE
chr1:47882001-47882500	0.2245	0.0117647	0.0122152	3.21398e-07	FOXE3
chr3:53530001-53530500	0.6305	0.0876471	0.15682	3.22333e-07	CACNA1D
chr8:144950501-144951000	0.7805	0.210588	0.37423	3.28072e-07	FALSE
chr10:42598501-42599000	5.5635	8.84118	8.25292	3.40388e-07	FALSE
chr16:33885001-33885500	3.2035	5.54471	6.07128	3.40388e-07	FALSE
chr16:34182501-34183000	3.954	7.60412	7.61095	3.40388e-07	FALSE
chr16:46401001-46401500	4.843	9.50294	9.36122	3.40388e-07	FALSE
chr16:46409501-46410000	4.6875	8.62235	7.88116	3.40388e-07	FALSE
chr16:46425501-46426000	4.891	9.11471	8.09404	3.40388e-07	FALSE
chr16:46429501-46430000	3.765	7.08765	6.44938	3.40388e-07	FALSE
chr2:89849001-89849500	3.9445	6.89059	6.96549	3.40388e-07	FALSE
chr20:29823501-29824000	2.769	4.63882	4.44606	3.40388e-07	FALSE

## Sheet: Table S4
Table S4 Correlation of EZH2 expression to expression of homeobox (Holland et al. 2007) and target genes (Yu et al. 2007) (column B) and target promoter methylation (+-2kb) (column D). Columns C and E show p-values for the correlations after Benjamini-Hochberg correction. Columns F and G state whether the respective correlation is significant (p<0.05)). Column H characterizes the gene as EZH2 tar…
gene name	Correlation of expression	BH corrected p-value	Correlation of methylation to EZH2 expression	BH corrected p-value	Expression significantly negatively correlated to EZH2 expression	Promoter methylation significantly correlated to EZH2 expression	Function
CPAMD8	-0.688802	0	0.360275	0.000495187	TRUE	TRUE	EZH2 target
ARMCX1	-0.639586	0	0.49989	6.84179e-07	TRUE	TRUE	EZH2 target
ABP1	-0.609934	9.95104e-10	0.271444	0.00894947	TRUE	TRUE	EZH2 target
PAGE4	-0.595871	0	0.447615	1.09473e-05	TRUE	TRUE	EZH2 target
CPA6	-0.564735	3.88419e-08	0.605229	9.90829e-10	TRUE	TRUE	EZH2 target
C1orf114	-0.539698	3.46205e-07	0.567635	9.74962e-09	TRUE	TRUE	EZH2 target
KLF8	-0.537836	3.46205e-07	0.583087	4.76993e-09	TRUE	TRUE	EZH2 target
SP8	-0.537318	3.46205e-07	0.384818	0.00018903	TRUE	TRUE	EZH2 target
BMPER	-0.501288	2.43306e-06	0.629396	2.60512e-10	TRUE	TRUE	EZH2 target
MMEL1	-0.500178	1.90314e-06	0.47444	2.6372e-06	TRUE	TRUE	EZH2 target
MPPED2	-0.489516	4.24376e-06	0.623461	3.48296e-10	TRUE	TRUE	EZH2 target
PENK	-0.483875	5.51516e-06	0.573756	7.07965e-09	TRUE	TRUE	EZH2 target
ALDH1A2	-0.480137	6.42568e-06	0.534767	8.17282e-08	TRUE	TRUE	EZH2 target
BDNF	-0.458763	1.96923e-05	0.493914	9.08452e-07	TRUE	TRUE	EZH2 target
HFE	-0.447186	3.42553e-05	0.469051	3.52825e-06	TRUE	TRUE	EZH2 target
MYOM2	-0.431473	5.61778e-05	0.406498	7.23957e-05	TRUE	TRUE	EZH2 target
MKX	-0.429521	6.88201e-05	0.604322	9.90829e-10	TRUE	TRUE	EZH2 target
GNAL	-0.421599	9.29438e-05	0.457951	6.33896e-06	TRUE	TRUE	EZH2 target
ACTC1	-0.41411	0.000127419	0.566603	1.00527e-08	TRUE	TRUE	EZH2 target
ARHGAP20	-0.399076	0.000244315	0.410869	6.09124e-05	TRUE	TRUE	EZH2 target
KRT17	-0.384434	0.000432098	0.503547	5.57418e-07	TRUE	TRUE	EZH2 target
TNFRSF19	-0.381383	0.000475778	0.294812	0.00444672	TRUE	TRUE	EZH2 target
CD40	-0.378513	0.000519832	0.50777	4.65928e-07	TRUE	TRUE	EZH2 target
SRPX	-0.367058	0.000736284	0.330756	0.00133359	TRUE	TRUE	EZH2 target
CYB5R2	-0.320157	0.00423971	0.55823	1.77209e-08	TRUE	TRUE	EZH2 target
EPHB6	-0.316629	0.00451686	0.642672	2.04877e-10	TRUE	TRUE	EZH2 target
FEV	-0.316251	0.00451686	0.581015	5.09627e-09	TRUE	TRUE	EZH2 target
WNT16	-0.31473	0.00451686	0.580118	5.09627e-09	TRUE	TRUE	EZH2 target
LMOD1	-0.305487	0.00630847	0.354248	0.000603502	TRUE	TRUE	EZH2 target
MEOX2	-0.294317	0.00867145	0.603512	9.90829e-10	TRUE	TRUE	EZH2 target
MYH7	-0.273716	0.0157339	0.333219	0.00123324	TRUE	TRUE	EZH2 target
LYNX1	-0.265188	0.0193653	0.551732	2.64642e-08	TRUE	TRUE	EZH2 target
CACNB2	-0.250196	0.0284232	0.584773	4.55367e-09	TRUE	TRUE	EZH2 target
CYP2E1	-0.248678	0.0286545	0.250357	0.0161418	TRUE	TRUE	EZH2 target
CSMD3	-0.247344	0.0291415	0.49442	9.08452e-07	TRUE	TRUE	EZH2 target
DNAJB4	-0.226302	0.0450979	0.156327	0.13931	TRUE	FALSE	EZH2 target
ADAMTS3	0.4236	8.79416e-05	0.350374	0.000693811	FALSE	TRUE	EZH2 target
OSMR	0.36432	0.00087642	0.629842	2.60512e-10	FALSE	TRUE	EZH2 target
HPSE2	-0.182573	0.103293	0.617843	4.76236e-10	FALSE	TRUE	EZH2 target
SATB2	0.196291	0.0850703	0.606803	9.90829e-10	FALSE	TRUE	EZH2 target
DOK5	-0.0461086	0.686243	0.579395	5.09627e-09	FALSE	TRUE	EZH2 target
HHIP	-0.00848264	0.934904	0.576188	6.1931e-09	FALSE	TRUE	EZH2 target
TAC1	-0.219079	0.0513266	0.570488	8.663e-09	FALSE	TRUE	EZH2 target
PTGER3	0.185456	0.0999923	0.569792	8.663e-09	FALSE	TRUE	EZH2 target
NR4A3	0.184728	0.10008	0.558132	1.77209e-08	FALSE	TRUE	EZH2 target
C20orf103	0.245843	0.0295693	0.554125	2.30355e-08	FALSE	TRUE	EZH2 target
ITGAL	0.22423	0.0467012	0.541787	5.31644e-08	FALSE	TRUE	EZH2 target
EGFLAM	-0.120003	0.282735	0.538733	6.38232e-08	FALSE	TRUE	EZH2 target
MYRIP	0.362528	0.000914183	0.52935	1.15632e-07	FALSE	TRUE	EZH2 target
FST	-0.0493841	0.677772	0.525023	1.50933e-07	FALSE	TRUE	EZH2 target
WNT2	-0.158441	0.155018	0.50492	5.25957e-07	FALSE	TRUE	EZH2 target
DKK2	0.173055	0.122507	0.496676	8.15112e-07	FALSE	TRUE	EZH2 target
FGF13	0.136926	0.221127	0.493644	9.08452e-07	FALSE	TRUE	EZH2 target
SLC40A1	-0.0525616	0.662205	0.488334	1.23061e-06	FALSE	TRUE	EZH2 target
PMP22	0.271039	0.0166582	0.486389	1.35188e-06	FALSE	TRUE	EZH2 target
SNCA	0.104899	0.352842	0.477817	2.21203e-06	FALSE	TRUE	EZH2 target
WWTR1	0.245017	0.0296707	0.458255	6.33896e-06	FALSE	TRUE	EZH2 target
SLFN11	-0.0135078	0.916186	0.441183	1.48048e-05	FALSE	TRUE	EZH2 target
ITGB8	-0.122886	0.273214	0.438041	1.71167e-05	FALSE	TRUE	EZH2 target
TRPS1	0.175364	0.118472	0.432302	2.26093e-05	FALSE	TRUE	EZH2 target
EDNRA	-0.153485	0.168103	0.419236	4.12568e-05	FALSE	TRUE	EZH2 target
PCDHB5	0.218281	0.0514873	0.410018	6.23052e-05	FALSE	TRUE	EZH2 target
TNC	0.241013	0.0324421	0.388905	0.000160291	FALSE	TRUE	EZH2 target
MYH11	-0.166965	0.134757	0.377469	0.000252116	FALSE	TRUE	EZH2 target
CHI3L1	0.255795	0.0248211	0.372228	0.000310536	FALSE	TRUE	EZH2 target
CXCL12	0.0306691	0.793177	0.370221	0.000332674	FALSE	TRUE	EZH2 target
COLEC12	0.272298	0.0164078	0.357983	0.000535216	FALSE	TRUE	EZH2 target
ITGB2	0.491237	4.11105e-06	0.355899	0.000573375	FALSE	TRUE	EZH2 target
FAM49A	0.238298	0.0342424	0.347614	0.000762239	FALSE	TRUE	EZH2 target
WDR18	0.229213	0.0426191	0.344196	0.000858477	FALSE	TRUE	EZH2 target
CLIC5	0.246962	0.0292411	0.335089	0.001182	FALSE	TRUE	EZH2 target
SLC1A1	0.101386	0.367138	0.319269	0.00199963	FALSE	TRUE	EZH2 target
PRKG1	-0.16327	0.143032	0.31717	0.00212643	FALSE	TRUE	EZH2 target
TGFB1	0.523208	8.0108e-07	0.282509	0.00652158	FALSE	TRUE	EZH2 target
MYL4	-0.187487	0.0970225	0.277257	0.00758582	FALSE	TRUE	EZH2 target
CAMK1G	-0.219695	0.0513266	0.26131	0.011946	FALSE	TRUE	EZH2 target
SOCS2	-0.0482504	0.67891	0.238885	0.0218463	FALSE	TRUE	EZH2 target
DPP4	-0.147004	0.187109	0.205572	0.0493745	FALSE	TRUE	EZH2 target
NCKAP1L	0.513018	1.39613e-06	0.150936	0.152475	FALSE	FALSE	EZH2 target
MYO6	0.442581	4.12094e-05	0.133351	0.206523	FALSE	FALSE	EZH2 target
RLN1	-0.191153	0.09243	0.120676	0.249423	FALSE	FALSE	EZH2 target
CTSG	-0.167133	0.134757	0.107346	0.303736	FALSE	FALSE	EZH2 target
DARC	-0.0754899	0.510414	0.0058986	0.954759	FALSE	FALSE	EZH2 target
HOXD13	-0.567539	1.33651e-07	0.505883	3.43198e-07	TRUE	TRUE	HOX gene
HMX1	-0.512612	3.62498e-06	0.501285	4.37126e-07	TRUE	TRUE	HOX gene
HOXD11	-0.501918	6.17875e-06	0.607851	6.02339e-10	TRUE	TRUE	HOX gene
HOXD9	-0.494744	6.17875e-06	0.312543	0.00261371	TRUE	TRUE	HOX gene
SIX2	-0.494275	8.51761e-06	0.491615	7.64004e-07	TRUE	TRUE	HOX gene
POU4F1	-0.477871	1.33705e-05	0.512943	2.24121e-07	TRUE	TRUE	HOX gene
SHOX2	-0.475084	1.85676e-05	0.622642	3.85404e-10	TRUE	TRUE	HOX gene
HOXD3	-0.469513	1.97981e-05	0.589708	1.41811e-09	TRUE	TRUE	HOX gene
HOXD4	-0.469513	1.97981e-05	0.374692	0.00025583	TRUE	TRUE	HOX gene
NKX2-5	-0.466951	2.18363e-05	0.607939	6.02339e-10	TRUE	TRUE	HOX gene
EN1	-0.463186	2.57249e-05	0.455348	5.88148e-06	TRUE	TRUE	HOX gene
LHX3	-0.455949	3.57388e-05	0.49658	5.7936e-07	TRUE	TRUE	HOX gene
LBX2	-0.45147	4.28189e-05	0.554677	1.55872e-08	TRUE	TRUE	HOX gene
POU3F1	-0.445661	5.43536e-05	0.541096	3.69765e-08	TRUE	TRUE	HOX gene
TLX2	-0.445535	5.43536e-05	0.630483	2.01941e-10	TRUE	TRUE	HOX gene
BARHL1	-0.43995	6.77314e-05	0.52936	8.25587e-08	TRUE	TRUE	HOX gene
GSC2	-0.433917	8.62418e-05	0.512567	2.27568e-07	TRUE	TRUE	HOX gene
LHX1	-0.432497	7.80361e-05	0.556878	1.35332e-08	TRUE	TRUE	HOX gene
MKX	-0.429521	0.000104065	0.604322	7.07578e-10	TRUE	TRUE	HOX gene
VAX1	-0.425994	0.000120165	0.596365	9.92124e-10	TRUE	TRUE	HOX gene
GSX1	-0.423754	0.000127204	0.601641	7.58178e-10	TRUE	TRUE	HOX gene
EMX1	-0.423698	0.000127204	0.632928	1.81056e-10	TRUE	TRUE	HOX gene
PBX4	-0.417805	0.000160136	0.592909	1.21608e-09	TRUE	TRUE	HOX gene
HOPX	-0.416363	0.000167245	0.613419	5.1846e-10	TRUE	TRUE	HOX gene
RAX2	-0.415013	0.000158754	0.505142	3.56771e-07	TRUE	TRUE	HOX gene
NKX6-2	-0.413452	0.000180198	0.615296	4.97338e-10	TRUE	TRUE	HOX gene
TPRX1	-0.41327	0.000180198	0.270947	0.0094071	TRUE	TRUE	HOX gene
CRX	-0.41327	0.000180198	0.252102	0.0155308	TRUE	TRUE	HOX gene
DLX3	-0.408875	0.000216075	0.588348	1.46017e-09	TRUE	TRUE	HOX gene
POU3F3	-0.408357	0.000216484	0.593971	1.1354e-09	TRUE	TRUE	HOX gene
HOXD8	-0.405641	0.00023998	0.529231	8.25587e-08	TRUE	TRUE	HOX gene
NKX6-3	-0.404367	0.000239985	0.324355	0.00178444	TRUE	TRUE	HOX gene
ONECUT1	-0.404283	0.000239985	0.57816	3.01378e-09	TRUE	TRUE	HOX gene
DBX2	-0.403597	0.00024273	0.41274	4.75201e-05	TRUE	TRUE	HOX gene
POU6F2	-0.402898	0.00024574	0.579016	2.87143e-09	TRUE	TRUE	HOX gene
RAX	-0.402003	0.000239985	0.603609	7.07578e-10	TRUE	TRUE	HOX gene
MEIS3	-0.397844	0.000302613	0.520111	1.4398e-07	TRUE	TRUE	HOX gene
PAX2	-0.393701	0.000336021	0.343126	0.000904937	TRUE	TRUE	HOX gene
HOXB4	-0.393575	0.000336021	0.525629	1.02744e-07	TRUE	TRUE	HOX gene
NKX2-8	-0.393449	0.000336021	0.542057	3.52784e-08	TRUE	TRUE	HOX gene
PAX7	-0.392147	0.000348816	0.563088	8.71892e-09	TRUE	TRUE	HOX gene
PAX6	-0.390603	0.000336021	0.610561	5.6877e-10	TRUE	TRUE	HOX gene
HOXA7	-0.389006	0.000348816	0.550821	1.95674e-08	TRUE	TRUE	HOX gene
BARX1	-0.386114	0.000439776	0.614463	5.01751e-10	TRUE	TRUE	HOX gene
HOXA13	-0.385624	0.000441906	0.416676	4.01942e-05	TRUE	TRUE	HOX gene
POU3F4	-0.383791	0.000470484	0.442874	1.13228e-05	TRUE	TRUE	HOX gene
ALX4	-0.382881	0.000479034	0.652992	5.30102e-11	TRUE	TRUE	HOX gene
CDX1	-0.382629	0.000479034	0.254551	0.0147239	TRUE	TRUE	HOX gene
PAX4	-0.382279	0.000479034	0.134925	0.196956	TRUE	FALSE	HOX gene
PITX2	-0.373376	0.000675851	0.492483	7.30015e-07	TRUE	TRUE	HOX gene
POU3F2	-0.371962	0.000703024	0.300347	0.00388424	TRUE	TRUE	HOX gene
MSX1	-0.371347	0.000703024	0.563971	8.37489e-09	TRUE	TRUE	HOX gene
PHOX2A	-0.371249	0.000703024	0.553218	1.70458e-08	TRUE	TRUE	HOX gene
HOXC10	-0.370703	0.000703024	0.602729	7.33734e-10	TRUE	TRUE	HOX gene
ISL2	-0.370703	0.000703024	0.554685	1.55872e-08	TRUE	TRUE	HOX gene
VAX2	-0.367441	0.000792513	0.560119	1.08349e-08	TRUE	TRUE	HOX gene
VSX1	-0.36313	0.000930873	0.589608	1.41811e-09	TRUE	TRUE	HOX gene
PDX1	-0.356453	0.0011756	0.528148	8.80914e-08	TRUE	TRUE	HOX gene
PITX1	-0.356271	0.0011756	0.466349	3.28976e-06	TRUE	TRUE	HOX gene
HOXD1	-0.351414	0.00139984	0.545271	2.85265e-08	TRUE	TRUE	HOX gene
PITX3	-0.351148	0.00139984	0.563295	8.70327e-09	TRUE	TRUE	HOX gene
DLX4	-0.348152	0.00154619	0.465466	3.43283e-06	TRUE	TRUE	HOX gene
IRX6	-0.346054	0.00154619	0.412671	4.75201e-05	TRUE	TRUE	HOX gene
EMX2	-0.342133	0.00185857	0.701712	5.04603e-13	TRUE	TRUE	HOX gene
PRRX2	-0.341797	0.00186032	0.530026	7.98328e-08	TRUE	TRUE	HOX gene
POU4F2	-0.341372	0.00180982	0.591655	1.29505e-09	TRUE	TRUE	HOX gene
VENTX	-0.337514	0.00215789	0.324174	0.00178515	TRUE	TRUE	HOX gene
ARX	-0.334644	0.00237181	0.439009	1.37913e-05	TRUE	TRUE	HOX gene
EVX1	-0.333385	0.00245608	0.578025	3.01378e-09	TRUE	TRUE	HOX gene
POU5F2	-0.331873	0.00252369	0.246189	0.018219	TRUE	TRUE	HOX gene
HOXA2	-0.330957	0.00250439	0.374594	0.00025583	TRUE	TRUE	HOX gene
HOXB9	-0.325518	0.0031237	0.594639	1.09739e-09	TRUE	TRUE	HOX gene
PHOX2B	-0.323516	0.00331866	0.602132	7.49054e-10	TRUE	TRUE	HOX gene
HOXA1	-0.322494	0.00340474	0.570285	5.22609e-09	TRUE	TRUE	HOX gene
PROP1	-0.317655	0.00376833	0.373726	0.000263806	TRUE	TRUE	HOX gene
HOXC12	-0.317245	0.00395398	0.492902	7.17306e-07	TRUE	TRUE	HOX gene
PAX8	-0.315721	0.00395398	0.610734	5.6877e-10	TRUE	TRUE	HOX gene
LHX6	-0.31159	0.0046317	0.619517	4.6759e-10	TRUE	TRUE	HOX gene
PAX3	-0.311584	0.00448049	0.600143	7.71645e-10	TRUE	TRUE	HOX gene
ESX1	-0.309255	0.00476309	0.522359	1.24747e-07	TRUE	TRUE	HOX gene
POU5F1	-0.309253	0.00488809	0.289997	0.00527493	TRUE	TRUE	HOX gene
MNX1	-0.308455	0.00489016	0.43616	1.58928e-05	TRUE	TRUE	HOX gene
HOXA3	-0.307945	0.00488809	0.647154	7.38924e-11	TRUE	TRUE	HOX gene
LHX8	-0.307357	0.00489016	0.541094	3.69765e-08	TRUE	TRUE	HOX gene
RHOXF1	-0.307112	0.00489016	0.203503	0.051284	TRUE	FALSE	HOX gene
TLX1	-0.306299	0.00518412	0.559709	1.10297e-08	TRUE	TRUE	HOX gene
IRX5	-0.303513	0.00563779	0.489239	8.77722e-07	TRUE	TRUE	HOX gene
LHX2	-0.300743	0.00590504	0.665038	2.11837e-11	TRUE	TRUE	HOX gene
IRX1	-0.299608	0.00629946	0.449974	7.78204e-06	TRUE	TRUE	HOX gene
HOXC9	-0.297438	0.0066926	0.582999	2.14768e-09	TRUE	TRUE	HOX gene
IRX4	-0.297214	0.0066926	0.45549	5.8811e-06	TRUE	TRUE	HOX gene
HOXC8	-0.296123	0.00681477	0.423855	2.83495e-05	TRUE	TRUE	HOX gene
MEOX2	-0.294317	0.00716285	0.603512	7.07578e-10	TRUE	TRUE	HOX gene
NKX2-1	-0.293687	0.00724772	0.524008	1.13719e-07	TRUE	TRUE	HOX gene
HOXB1	-0.283511	0.00983346	0.239069	0.0219996	TRUE	TRUE	HOX gene
NKX6-1	-0.282825	0.00996216	0.590596	1.38789e-09	TRUE	TRUE	HOX gene
GBX2	-0.282167	0.010084	0.609338	5.95846e-10	TRUE	TRUE	HOX gene
HOXB8	-0.281467	0.0102208	0.504762	3.62283e-07	TRUE	TRUE	HOX gene
ALX3	-0.276988	0.01163	0.583939	2.04375e-09	TRUE	TRUE	HOX gene
GSX2	-0.270157	0.0141182	0.600121	7.71645e-10	TRUE	TRUE	HOX gene
TLX3	-0.268155	0.0147942	0.571828	4.76037e-09	TRUE	TRUE	HOX gene
LHX4	-0.267007	0.0149494	0.212664	0.041443	TRUE	TRUE	HOX gene
CDX4	-0.266703	0.0149068	0.457839	5.20083e-06	TRUE	TRUE	HOX gene
NKX2-2	-0.265747	0.0152768	0.523271	1.18388e-07	TRUE	TRUE	HOX gene
CDX2	-0.265611	0.0151628	0.502313	4.16651e-07	TRUE	TRUE	HOX gene
IRX2	-0.260862	0.0174697	0.406054	6.43749e-05	TRUE	TRUE	HOX gene
NKX3-2	-0.256117	0.0198515	0.580294	2.6274e-09	TRUE	TRUE	HOX gene
ISL1	-0.254871	0.0204093	0.459573	4.75668e-06	TRUE	TRUE	HOX gene
POU4F3	-0.252506	0.0216482	0.594689	1.09739e-09	TRUE	TRUE	HOX gene
HOXB2	-0.251709	0.0216645	0.484992	1.11067e-06	TRUE	TRUE	HOX gene
DUXA	-0.249342	0.0232925	0.120448	0.248443	TRUE	FALSE	HOX gene
HHEX	-0.248152	0.0238952	0.45326	6.55e-06	TRUE	TRUE	HOX gene
HOXB3	-0.242595	0.0275967	0.526193	9.98631e-08	TRUE	TRUE	HOX gene
SIX6	-0.241055	0.0285578	0.549582	2.12102e-08	TRUE	TRUE	HOX gene
NKX2-3	-0.238326	0.0304962	0.633849	1.81056e-10	TRUE	TRUE	HOX gene
NANOGP1	-0.237486	0.0307488	0.261807	0.0121399	TRUE	TRUE	HOX gene
NANOG	-0.237486	0.0307488	0.201785	0.0525892	TRUE	FALSE	HOX gene
LHX5	-0.235904	0.0316187	0.425388	2.6623e-05	TRUE	TRUE	HOX gene
POU2F3	-0.228821	0.0377369	0.378438	0.000219582	TRUE	TRUE	HOX gene
HOXD10	-0.226548	0.0394271	0.424963	2.70045e-05	TRUE	TRUE	HOX gene
ZFHX2	-0.222816	0.0433418	0.413615	4.60241e-05	TRUE	TRUE	HOX gene
HOXC4	0.470143	1.97981e-05	0.615954	4.97338e-10	FALSE	TRUE	HOX gene
HOXC5	0.470143	1.97981e-05	0.615954	4.97338e-10	FALSE	TRUE	HOX gene
HOXC6	0.470143	1.97981e-05	0.615954	4.97338e-10	FALSE	TRUE	HOX gene
OTX2	-0.0706047	0.541442	0.612087	5.5214e-10	FALSE	TRUE	HOX gene
DLX6	-0.195382	0.07824	0.608965	5.95846e-10	FALSE	TRUE	HOX gene
SATB2	0.196291	0.0773038	0.606803	6.35027e-10	FALSE	TRUE	HOX gene
LMX1A	-0.143743	0.203311	0.605313	6.97808e-10	FALSE	TRUE	HOX gene
BARHL2	-0.0425672	0.715019	0.603645	7.07578e-10	FALSE	TRUE	HOX gene
GSC	-0.17339	0.11973	0.60056	7.71645e-10	FALSE	TRUE	HOX gene
HLX	-0.11029	0.325339	0.59952	7.919e-10	FALSE	TRUE	HOX gene
ALX1	-0.113172	0.31562	0.598431	8.4904e-10	FALSE	TRUE	HOX gene
LBX1	-0.153401	0.174229	0.591971	1.2889e-09	FALSE	TRUE	HOX gene
TSHZ3	-0.068967	0.54963	0.588697	1.45547e-09	FALSE	TRUE	HOX gene
TSHZ2	0.200112	0.0713247	0.588609	1.45547e-09	FALSE	TRUE	HOX gene
LHX9	-0.122508	0.278052	0.588125	1.46067e-09	FALSE	TRUE	HOX gene
MEIS2	-0.183273	0.0991214	0.582922	2.14768e-09	FALSE	TRUE	HOX gene
HOXC11	-0.0989015	0.379304	0.576326	3.40907e-09	FALSE	TRUE	HOX gene
SIX3	-0.182167	0.10087	0.574351	3.94183e-09	FALSE	TRUE	HOX gene
OTP	-0.124028	0.273249	0.571037	4.99535e-09	FALSE	TRUE	HOX gene
ONECUT2	0.118596	0.295089	0.567836	6.26098e-09	FALSE	TRUE	HOX gene
PAX5	-0.0336791	0.771156	0.553153	1.70458e-08	FALSE	TRUE	HOX gene
HOXB7	-0.143841	0.203311	0.552649	1.74823e-08	FALSE	TRUE	HOX gene
MEIS1	-0.106901	0.340064	0.55105	1.94758e-08	FALSE	TRUE	HOX gene
HNF1B	0.103695	0.354856	0.54647	2.64217e-08	FALSE	TRUE	HOX gene
DLX2	0.0417345	0.718207	0.544323	3.02286e-08	FALSE	TRUE	HOX gene
HOXB6	-0.21033	0.0576449	0.536565	5.07321e-08	FALSE	TRUE	HOX gene
NOTO	0.645031	0	0.517593	1.69069e-07	FALSE	TRUE	HOX gene
ZEB2	0.208763	0.0594435	0.515267	1.95744e-07	FALSE	TRUE	HOX gene
LMX1B	-0.180515	0.103836	0.513072	2.24121e-07	FALSE	TRUE	HOX gene
DLX5	0.203059	0.0668627	0.510229	2.6312e-07	FALSE	TRUE	HOX gene
DLX1	0.331733	0.00252369	0.507271	3.16478e-07	FALSE	TRUE	HOX gene
HOXA9	0.236912	0.0310031	0.503782	3.8246e-07	FALSE	TRUE	HOX gene
EN2	-0.13701	0.222644	0.501506	4.34851e-07	FALSE	TRUE	HOX gene
OTX1	0.0791506	0.489427	0.49875	5.09376e-07	FALSE	TRUE	HOX gene
VSX2	-0.138606	0.217732	0.494603	6.50479e-07	FALSE	TRUE	HOX gene
BARX2	-0.0406915	0.721914	0.487067	9.94794e-07	FALSE	TRUE	HOX gene
PRRX1	0.0206047	0.85463	0.485995	1.0534e-06	FALSE	TRUE	HOX gene
PBX2	0.267651	0.0148982	0.467282	3.14331e-06	FALSE	TRUE	HOX gene
IRX3	-0.0018477	0.985848	0.435911	1.5981e-05	FALSE	TRUE	HOX gene
TGIF2	0.438901	5.95044e-05	0.433222	1.82402e-05	FALSE	TRUE	HOX gene
SATB1	0.191909	0.0831442	0.427223	2.46174e-05	FALSE	TRUE	HOX gene
HOXA5	-0.0280095	0.806082	0.425568	2.65732e-05	FALSE	TRUE	HOX gene
HOXA4	-0.183917	0.0983669	0.414204	4.50375e-05	FALSE	TRUE	HOX gene
HOXA11	0.378905	0.000544389	0.409764	5.42986e-05	FALSE	TRUE	HOX gene
ZHX1	0.357279	0.00115958	0.386214	0.000159141	FALSE	TRUE	HOX gene
CUX1	0.531719	1.31257e-06	0.386048	0.000159253	FALSE	TRUE	HOX gene
HOXA6	0.111478	0.32055	0.380841	0.000199056	FALSE	TRUE	HOX gene
PBX1	0.270003	0.0141182	0.358016	0.000504593	FALSE	TRUE	HOX gene
HOXC13	0.132846	0.23834	0.334076	0.00126968	FALSE	TRUE	HOX gene
HNF1A	-0.11425	0.312043	0.333421	0.00129307	FALSE	TRUE	HOX gene
PKNOX2	-0.162221	0.148993	0.329466	0.0014888	FALSE	TRUE	HOX gene
ADNP	0.535526	1.15853e-06	0.32163	0.00194519	FALSE	TRUE	HOX gene
TGIF1	0.0215006	0.851822	0.316895	0.00228969	FALSE	TRUE	HOX gene
ZHX3	0.559583	1.33651e-07	0.315256	0.00241157	FALSE	TRUE	HOX gene
ZFHX4	0.396627	0.000313567	0.313515	0.00254833	FALSE	TRUE	HOX gene
HESX1	-0.145829	0.198073	0.312448	0.00261371	FALSE	TRUE	HOX gene
PKNOX1	0.204759	0.0648891	0.303847	0.00349302	FALSE	TRUE	HOX gene
TSHZ1	0.475812	1.85676e-05	0.302946	0.00357997	FALSE	TRUE	HOX gene
HOXB5	-0.155235	0.169299	0.298892	0.00405404	FALSE	TRUE	HOX gene
MEOX1	-0.13869	0.217732	0.298478	0.00408656	FALSE	TRUE	HOX gene
ZHX2	0.48463	1.33705e-05	0.295623	0.00446608	FALSE	TRUE	HOX gene
POU2F2	-0.215538	0.0511843	0.292629	0.00489841	FALSE	TRUE	HOX gene
RHOXF2	-0.193379	0.080974	0.270134	0.00958733	FALSE	TRUE	HOX gene
POU2F1	0.599314	0	0.261198	0.0122903	FALSE	TRUE	HOX gene
SIX1	0.527646	1.53102e-06	0.256187	0.0141279	FALSE	TRUE	HOX gene
ZEB1	0.056355	0.624867	0.252399	0.0155308	FALSE	TRUE	HOX gene
HOMEZ	0.575308	7.87167e-08	0.238772	0.0220601	FALSE	TRUE	HOX gene
ADNP2	0.482965	1.33705e-05	0.229009	0.028379	FALSE	TRUE	HOX gene
SIX5	-0.0601764	0.601091	0.223389	0.0324285	FALSE	TRUE	HOX gene
TPRXL	-0.129425	0.251192	0.217602	0.0372862	FALSE	TRUE	HOX gene
MSX2	-0.0318029	0.781156	0.217033	0.0376215	FALSE	TRUE	HOX gene
HOXB13	0.346389	0.00161997	0.215825	0.0385614	FALSE	TRUE	HOX gene
DMBX1	-0.215901	0.0510708	0.202515	0.0522193	FALSE	FALSE	HOX gene
SIX4	0.313102	0.00448049	0.198339	0.0565721	FALSE	FALSE	HOX gene
POU1F1	0.0856243	0.453164	0.19819	0.0565721	FALSE	FALSE	HOX gene
RHOXF2B	-0.193379	0.080974	0.170676	0.102006	FALSE	FALSE	HOX gene
TGIF2LY	-0.140239	0.214318	0.147307	0.159505	FALSE	FALSE	HOX gene
NKX3-1	0.0790034	0.489427	0.140079	0.180829	FALSE	FALSE	HOX gene
PBX3	0.320017	0.00367647	0.13111	0.209259	FALSE	FALSE	HOX gene
HMBOX1	0.288634	0.00844415	0.101801	0.329349	FALSE	FALSE	HOX gene
TGIF2LX	-0.140239	0.214318	0.0950114	0.361423	FALSE	FALSE	HOX gene
HDX	-0.00390538	0.974587	0.0824234	0.427148	FALSE	FALSE	HOX gene
